# Supplementary material for: Efficient V2O5/TiO2 composite catalysts for dimethoxymethane synthesis from methanol selective oxidation
Source: Royal Society of Chemistry journal article supplement (doi:10.1039/c4ra16727a), 2015-01-01
Supplement: c4ra16727a1.pdf [file c4ra16727a1.pdf]

## Supporting Information

### Efficient $V_2O_5/TiO_2$ composite catalysts for dimethoxymethane synthesis from methanol selective oxidation

Zhihong Fan <sup>a, b, c</sup>, Heqin Guo <sup>a</sup>, Kegong Fang <sup>a, \*</sup>, Yuhan Sun <sup>d, \*</sup>

<sup>a</sup> State Key Laboratory of Coal Conversion, Institute of Coal Chemistry, Chinese Academy of Sciences, Shanxi, Taiyuan 030001, P. R. China

<sup>b</sup> University of Chinese Academy of Sciences, Beijing, 100049, P. R. China

<sup>c</sup> Shanxi Agricultural University, Shanxi, Taigu, 030801, P. R. China

<sup>d</sup> Low Carbon Conversion Center, Shanghai Advanced Research Institute, Chinese Academy of Sciences, Shanghai, 201203, P. R. China

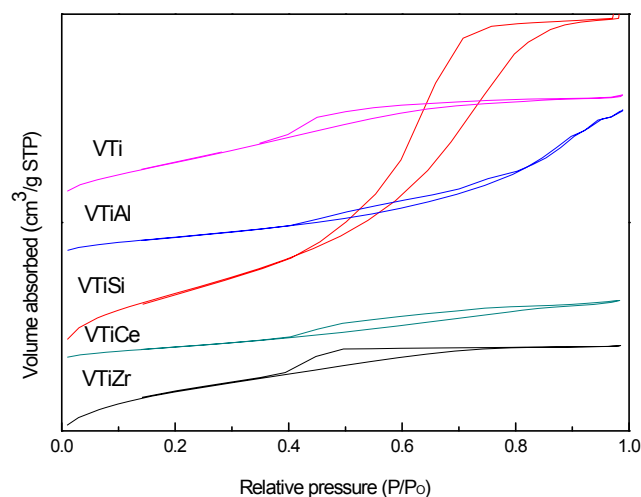

Fig. S1. N<sub>2</sub> adsorption and desorption isotherms of the VTi, VTiAl, VTiSi, VTiCe and VTiZr samples.
